# Supplementary material
Source: MDPI journal article supplement (https://www.mdpi.com/1424-8247/14/8/739)
Supplement: s1 [file s1]

### Supporting Information:

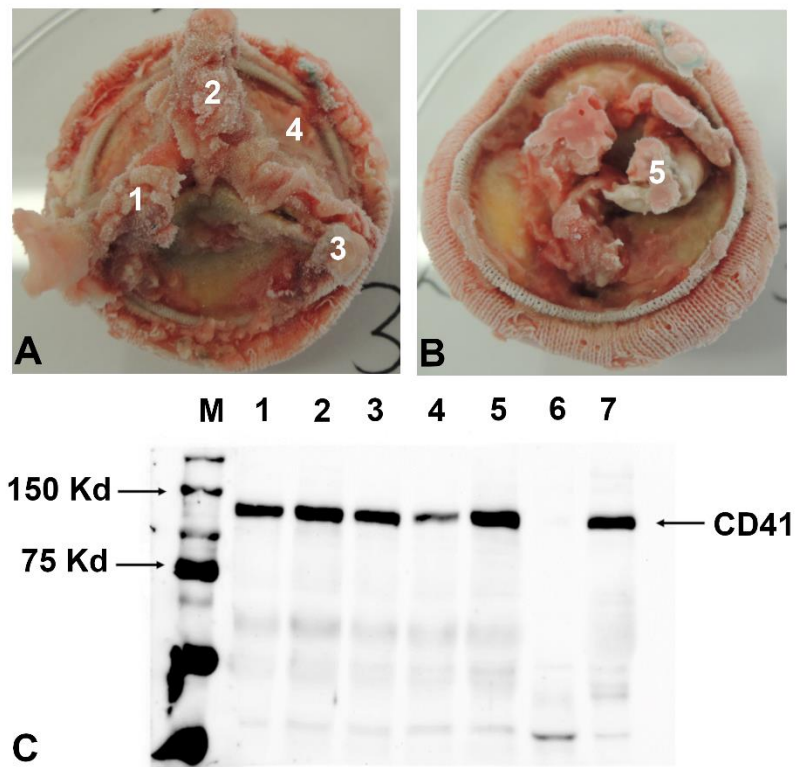

**Figure S1.** Western blot of endocarditic material on explanted bioprosthesis: (a) Bottom view of frozen explanted bioprosthesis, numbers 1-3 indicating the positions of material taken for western blot; (b) Top view of frozen explanted bioprosthesis, numbers 4-5 indicating the positions of material taken for western blot; (c) Western blot of endocarditic material (numbers 1-5) confirmed the presence of GPIIb/IIIa receptor, line 6: negative control, line 7: positive control with GPIIb/IIIa positive material.

**Video S1:** Rotating, 3-dimesional maximum intensity projection (MIP) PET image reconstruction of patient # 1.

**Video S2:** Rotating, 3-dimesional maximum intensity projection (MIP) PET image reconstruction of patient # 2.

**Video S3:** Rotating, 3-dimesional maximum intensity projection (MIP) PET image reconstruction of endocarditic bioprosthesis.

**Video S4:** Rotating, 3-dimesional maximum intensity projection (MIP) PET image reconstruction of unused bioprosthesis.
